# Supplementary material for: A systematic review on machine learning in sellar region diseases: quality and reporting items
Source: PubMed Central journal article supplement — Endocr Connect. 2019 Jun 11;8(7):952–60. doi: 10.1530/EC-19-0156 (PMC6612064; doi:10.1530/ec-19-0156), 2019-06-11
Supplement: supplementary_table_1.pdf [file supplementary_table_1.pdf]

Supplement Table 1. Searching algorithms

| Pubmed         |                                                                                                                                                                                      |
|----------------|--------------------------------------------------------------------------------------------------------------------------------------------------------------------------------------|
| #1             | “sellar tumor” OR “craniopharyngioma” OR “acromegaly” OR “cushing's disease” OR “pituitary neoplasms”[mesh] OR “hypopituitarism” OR “hypophysitis” OR “growth hormone” OR “cortisol” |
| #2             | “machine learning” OR “decision tree” OR “neural network” OR “support vector machine” OR “LASSO” OR “k-means” OR “knn”                                                               |
|                | #1 AND #2                                                                                                                                                                            |
| Web of Science |                                                                                                                                                                                      |
| #1             | TS = (machine learning OR decision tree OR neural network OR support vector machine OR LASSO OR k-means OR knn)                                                                      |
| #2             | TS = (sellar tumor OR craniopharyngioma OR acromegaly OR cushing's disease OR pituitary OR hypopituitarism OR hypophysitis OR growth hormone OR cortisol)                            |
|                | #1 AND #2                                                                                                                                                                            |
