# Supplementary material for: A systematic review on machine learning in sellar region diseases: quality and reporting items
Source: PubMed Central journal article supplement — Endocr Connect. 2019 Jun 11;8(7):952–60. doi: 10.1530/EC-19-0156 (PMC6612064; doi:10.1530/ec-19-0156), 2019-06-11
Supplement: supplementary_table_2.pdf [file supplementary_table_2.pdf]

Supplement Table 2. PRISMA Checklist

| Section/topic                      | #  | Checklist item                                                                                                                                                                                                         | Page/Paragraph Location                         |
|------------------------------------|----|------------------------------------------------------------------------------------------------------------------------------------------------------------------------------------------------------------------------|-------------------------------------------------|
| <b>TITLE</b>                       |    |                                                                                                                                                                                                                        |                                                 |
| Title                              | 1  | Identify the report as a systematic review, meta-analysis, or both.                                                                                                                                                    | Page 1 Title                                    |
| <b>INTRODUCTION</b>                |    |                                                                                                                                                                                                                        |                                                 |
| Rationale                          | 3  | Describe the rationale for the review in the context of what is already known.                                                                                                                                         | Page 3 Introduction Paragraph 2-3               |
| Objectives                         | 4  | Provide an explicit statement of questions being addressed with reference to participants, interventions, comparisons, outcomes, and study design (PICOS).                                                             | Page 3 Introduction Paragraph 3                 |
| <b>METHODS</b>                     |    |                                                                                                                                                                                                                        |                                                 |
| Protocol and registration          | 5  | Indicate if a review protocol exists, if and where it can be accessed (e.g., Web address), and, if available, provide registration information including registration number.                                          | Page 3 Methods Paragraph 1                      |
| Eligibility criteria               | 6  | Specify study characteristics (e.g., PICOS, length of follow-up) and report characteristics (e.g., years considered, language, publication status) used as criteria for eligibility, giving rationale.                 | Page 3-4 Methods Paragraph 1                    |
| Information sources                | 7  | Describe all information sources (e.g., databases with dates of coverage, contact with study authors to identify additional studies) in the search and date last searched.                                             | Page 3 Methods Paragraph 1                      |
| Search                             | 8  | Present full electronic search strategy for at least one database, including any limits used, such that it could be repeated.                                                                                          | Page 3 Methods Paragraph 1 (Supplement Table 1) |
| Study selection                    | 9  | State the process for selecting studies (i.e., screening, eligibility, included in systematic review, and, if applicable, included in the meta-analysis).                                                              | Page 3 Methods Paragraph 2                      |
| Data collection process            | 10 | Describe method of data extraction from reports (e.g., piloted forms, independently, in duplicate) and any processes for obtaining and confirming data from investigators.                                             | Page 3 Methods Paragraph 3                      |
| Data items                         | 11 | List and define all variables for which data were sought (e.g., PICOS, funding sources) and any assumptions and simplifications made.                                                                                  | Page 3 Methods Paragraph 3                      |
| Risk of bias in individual studies | 12 | Describe methods used for assessing risk of bias of individual studies (including specification of whether this was done at the study or outcome level), and how this information is to be used in any data synthesis. | Page 3 Methods Paragraph 4                      |
| Summary measures                   | 13 | State the principal summary measures (e.g., risk ratio, difference in means).                                                                                                                                          | Not applicable                                  |
| Synthesis of results               | 14 | Describe the methods of handling data and combining results of studies, if done, including measures of consistency (e.g., $I^2$ ) for each meta-analysis.                                                              | Not applicable                                  |
| Risk of bias across studies        | 15 | Specify any assessment of risk of bias that may affect the cumulative evidence (e.g., publication bias, selective reporting within studies).                                                                           | Page 3 Methods Paragraph 4                      |
| Additional analyses                | 16 | Describe methods of additional analyses (e.g., sensitivity or subgroup analyses, meta-regression), if done, indicating which were pre-specified.                                                                       | Not applicable                                  |
| <b>RESULTS</b>                     |    |                                                                                                                                                                                                                        |                                                 |
| Study selection                    | 17 | Give numbers of studies screened, assessed for eligibility, and included in the review, with reasons for exclusions at each stage, ideally with a flow diagram.                                                        | Page 4 Results Paragraph 1                      |
| Study characteristics              | 18 | For each study, present characteristics for which data were extracted (e.g., study size, PICOS, follow-up period) and provide the citations.                                                                           | Page 4 Results Paragraph 1-3 (Table 2)          |
| Risk of bias within studies        | 19 | Present data on risk of bias of each study and, if available, any outcome level assessment (see item 12).                                                                                                              | Page 4 Results Paragraph 4 (Table 3)            |
| Results of individual studies      | 20 | For all outcomes considered (benefits or harms), present, for each study: (a) simple summary data for each intervention group (b) effect estimates and confidence intervals, ideally                                   | Not applicable                                  |

| <b>Section/topic</b>        | <b>#</b> | <b>Checklist item</b>                                                                                                                                                                | <b>Page/Paragraph Location</b> |
|-----------------------------|----------|--------------------------------------------------------------------------------------------------------------------------------------------------------------------------------------|--------------------------------|
|                             |          | with a forest plot.                                                                                                                                                                  |                                |
| Synthesis of results        | 21       | Present the main results of the review. If meta-analyses are done, include for each, confidence intervals and measures of consistency                                                | Page 4 Results Paragraph 2-4   |
| Risk of bias across studies | 22       | Present results of any assessment of risk of bias across studies (see Item 15).                                                                                                      | Page 4 Results Paragraph 4     |
| Additional analysis         | 23       | Give results of additional analyses, if done (e.g., sensitivity or subgroup analyses, meta-regression [see Item 16]).                                                                | Not applicable                 |
| <b>DISCUSSION</b>           |          |                                                                                                                                                                                      |                                |
| Summary of evidence         | 24       | Summarize the main findings including the strength of evidence for each main outcome; consider their relevance to key groups (e.g., healthcare providers, users, and policy makers). | Page 5 Discussion Paragraph 1  |
| Limitations                 | 25       | Discuss limitations at study and outcome level (e.g., risk of bias), and at review-level (e.g., incomplete retrieval of identified research, reporting bias).                        | Page 6 Discussion Paragraph 8  |
| Conclusions                 | 26       | Provide a general interpretation of the results in the context of other evidence, and implications for future research.                                                              | Page 6 Conclusions Paragraph 1 |
| <b>FUNDING</b>              |          |                                                                                                                                                                                      |                                |
| Funding                     | 27       | Describe sources of funding for the systematic review and other support (e.g., supply of data); role of funders for the systematic review.                                           | Page 1 Acknowledgments         |
