# Supplementary material for: A systematic review on machine learning in sellar region diseases: quality and reporting items
Source: PubMed Central journal article supplement — Endocr Connect. 2019 Jun 11;8(7):952–60. doi: 10.1530/EC-19-0156 (PMC6612064; doi:10.1530/ec-19-0156), 2019-06-11
Supplement: supplementary_table_3.pdf [file supplementary_table_3.pdf]

Supplement Table 3. Packages, platforms and hyperparameters for machine learning models

|                                         | Platforms and packages |                 |                          | Hyperparameters                                                                                                                                                                                                                                                             |
|-----------------------------------------|------------------------|-----------------|--------------------------|-----------------------------------------------------------------------------------------------------------------------------------------------------------------------------------------------------------------------------------------------------------------------------|
|                                         | Stata                  | R               | python                   |                                                                                                                                                                                                                                                                             |
| logistic regression with LASSO or Ridge | LASSOPACK,<br>PDSLASSO | glmnet          | scikit-learn             | $\lambda$                                                                                                                                                                                                                                                                   |
| support vector machine                  | svmachines             | e1071           | scikit-learn             | kernel,<br>cost (if applicable),<br>gamma (if applicable)                                                                                                                                                                                                                   |
| linear discriminant analysis            | discrim                | MASS            | scikit-learn             | NA                                                                                                                                                                                                                                                                          |
| k-nearest neighbor                      | discrim                | class           | scikit-learn             | k                                                                                                                                                                                                                                                                           |
| random forest                           | not recommend          | randomforest    | scikit-learn             | number of variables randomly sampled at each split,<br>number of trees to grow                                                                                                                                                                                              |
| gradient boosting model                 | not recommend          | gbm,<br>xgboost | scikit-learn,<br>Xgboost | minimum number of samples which are required in a node<br>to be considered for splitting,<br>minimum samples required in a terminal leaf,<br>maximum depth of a tree,<br>maximum number of terminal eaves in a tree,<br>gamma,<br>learning rate,<br>number of trees to grow |
| fully connected neural network          | not recommend          | keras           | keras,<br>tensorflow     | number of hidden layers,<br>number of neurons in each hidden layer,<br>learning rate,<br>optimizer,<br>rate of drop out                                                                                                                                                     |
| convolutional neural network            | not recommend          | keras           | keras,<br>tensorflow     | structure,<br>pre-set weights (transfer learning),<br>learning rate,<br>optimizer,<br>rate of drop out,<br>batches                                                                                                                                                          |

NA: not applicable; LASSO: least absolute shrinkage and selection operator
